# Supplementary material for: Diagnostic Accuracy of High-Grade Intraepithelial Papillary Capillary Loops by Narrow Band Imaging for Early Detection of Oral Malignancy: A Cross-Sectional Clinicopathological Imaging Study
Source: MDPI journal article supplement (doi:10.3390/cancers14102415), 2022-05-13
Supplement: s1 [file s1]

## Supplemental Data

Participant Characteristics.

| Participants | Gender | Age | Histopathological<br>diagnosis by incisional<br>biopsy | Site           | Clinical appearance<br>(homogeneous /non-homogeneous) | Type of intraoral<br>epithelial papillary<br>capillary loops (IPCL) |
|--------------|--------|-----|--------------------------------------------------------|----------------|-------------------------------------------------------|---------------------------------------------------------------------|
| 1            | F      | 67  | OLP                                                    | Oral vestibule | Homogeneous                                           | I                                                                   |
| 2            | F      | 67  | OLP                                                    | Buccal mucosa  | Homogeneous                                           | II                                                                  |
| 3            | F      | 78  | OLP                                                    | Buccal mucosa  | Non-Homogeneous                                       | III                                                                 |
| 4            | F      | 39  | OLP                                                    | Buccal mucosa  | Homogeneous                                           | II                                                                  |
| 5            | F      | 69  | OLP                                                    | Buccal mucosa  | Homogeneous                                           | I                                                                   |
| 6            | F      | 60  | OLP                                                    | Buccal mucosa  | Non-Homogeneous                                       | II                                                                  |
| 7            | F      | 79  | OLP                                                    | Buccal mucosa  | Non-Homogeneous                                       | III                                                                 |
| 8            | M      | 44  | OLP                                                    | Buccal mucosa  | Homogeneous                                           | II                                                                  |
| 9            | M      | 65  | OLP                                                    | Buccal mucosa  | Non-Homogeneous                                       | III                                                                 |
| 10           | F      | 76  | OLP                                                    | Buccal mucosa  | Homogeneous                                           | II                                                                  |
| 11           | M      | 53  | OLP                                                    | Buccal mucosa  | Non-Homogeneous                                       | II                                                                  |
| 12           | F      | 52  | OLP                                                    | Tongue         | Homogeneous                                           | II                                                                  |
| 13           | F      | 38  | OLP                                                    | Buccal mucosa  | Non-Homogeneous                                       | II                                                                  |
| 14           | F      | 35  | OLP                                                    | Buccal mucosa  | Non-Homogeneous                                       | III                                                                 |
| 15           | F      | 65  | OLP                                                    | Buccal mucosa  | Non-Homogeneous                                       | I                                                                   |
| 16           | F      | 63  | OLP                                                    | Buccal mucosa  | Non-Homogeneous                                       | I                                                                   |

|    |   |    |                                         |               |                 |     |
|----|---|----|-----------------------------------------|---------------|-----------------|-----|
| 17 | M | 71 | Oral epithelial<br>hyperplasia          | Tongue        | Homogeneous     | I   |
| 18 | F | 64 | Proliferative verrucous<br>leukoplakia  | Hard palate   | Non-Homogeneous | IV  |
| 19 | F | 74 | Oral epithelial<br>hyperplasia          | Hard palate   | Homogeneous     | 0   |
| 20 | M | 77 | Oral epithelial<br>dysplasia (mild)     | Tongue        | Homogeneous     | 0   |
| 21 | F | 79 | Oral epithelial<br>dysplasia (moderate) | Tongue        | Homogeneous     | 0   |
| 22 | F | 38 | Oral epithelial<br>hyperplasia          | Tongue        | Homogeneous     | I   |
| 23 | F | 79 | Oral epithelial<br>hyperplasia          | Gingiva       | Homogeneous     | I   |
| 24 | M | 62 | Oral epithelial<br>hyperplasia          | Buccal mucosa | Homogeneous     | I   |
| 25 | F | 58 | Oral epithelial<br>hyperplasia          | Tongue        | Homogeneous     | 0   |
| 26 | M | 48 | Oral epithelial<br>hyperplasia          | Hard palate   | Homogeneous     | 0   |
| 27 | F | 52 | Oral epithelial<br>hyperplasia          | Gingiva       | Homogeneous     | I   |
| 28 | M | 65 | Oral epithelial                         | Buccal mucosa | Homogeneous     | III |

|    |   |    |                 |               |                 |    |
|----|---|----|-----------------|---------------|-----------------|----|
|    |   |    | hyperplasia     |               |                 |    |
| 29 | F | 67 | Hyperkeratosis  | Buccal mucosa | Non-Homogeneous | II |
| 30 | F | 47 | Oral epithelial | Gingiva       | Homogeneous     | 0  |
|    |   |    | hyperplasia     |               |                 |    |
| 31 | F | 60 | Oral epithelial | Gingiva       | Homogeneous     | I  |
|    |   |    | hyperplasia     |               |                 |    |
| 32 | M | 81 | Oral epithelial | Buccal mucosa | Homogeneous     | 0  |
|    |   |    | dysplasia       |               |                 |    |
|    |   |    | (mild~moderate) |               |                 |    |
| 33 | F | 61 | Oral epithelial | Buccal mucosa | Homogeneous     | II |
|    |   |    | hyperplasia     |               |                 |    |
| 34 | M | 55 | Oral epithelial | Hard palate   | Homogeneous     | I  |
|    |   |    | hyperplasia     |               |                 |    |
| 35 | F | 59 | Oral epithelial | Gingiva       | Homogeneous     | I  |
|    |   |    | hyperplasia     |               |                 |    |
| 36 | M | 47 | Oral epithelial | Gingiva       | Homogeneous     | I  |
|    |   |    | hyperplasia     |               |                 |    |
| 37 | M | 60 | Oral epithelial | Gingiva       | Homogeneous     | 0  |
|    |   |    | hyperplasia     |               |                 |    |
| 38 | F | 65 | Oral epithelial | Gingiva       | Homogeneous     | I  |
|    |   |    | hyperplasia     |               |                 |    |
| 39 | F | 79 | Oral epithelial | Buccal mucosa | Homogeneous     | I  |
|    |   |    | hyperplasia     |               |                 |    |

|    |   |    |                                         |               |                 |     |
|----|---|----|-----------------------------------------|---------------|-----------------|-----|
| 40 | M | 44 | Oral epithelial<br>hyperplasia          | Gingiva       | Homogeneous     | I   |
| 41 | M | 73 | Oral epithelial<br>hyperplasia          | Hard palate   | Homogeneous     | I   |
| 42 | M | 72 | Oral epithelial<br>hyperplasia          | Gingiva       | Homogeneous     | 0   |
| 43 | M | 69 | Oral epithelial<br>hyperplasia          | Buccal mucosa | Homogeneous     | I   |
| 44 | M | 47 | Oral epithelial<br>dysplasia (moderate) | Tongue        | Non-Homogeneous | IV  |
| 45 | M | 65 | Proliferative verrucous<br>leukoplakia  | Tongue        | Non-Homogeneous | III |
| 46 | M | 70 | Oral epithelial<br>hyperplasia          | Tongue        | Homogeneous     | II  |
| 47 | F | 63 | Oral epithelial<br>dysplasia (moderate) | Tongue        | Non-Homogeneous | III |
| 48 | M | 78 | Carcinoma in situ                       | Oral floor    | Homogeneous     | III |
| 49 | F | 87 | OSCC                                    | Gingiva       | Non-Homogeneous | III |
| 50 | M | 73 | OSCC                                    | Tongue        | Non-Homogeneous | IV  |
| 51 | F | 48 | OSCC                                    | Tongue        | Non-Homogeneous | III |
| 52 | M | 74 | OSCC                                    | Tongue        | Non-Homogeneous | IV  |
| 53 | M | 81 | OSCC                                    | Tongue        | Non-Homogeneous | IV  |
| 54 | F | 83 | OSCC                                    | Hard palate   | Non-Homogeneous | III |

|    |   |    |      |         |                 |     |
|----|---|----|------|---------|-----------------|-----|
| 55 | F | 79 | OSCC | Tongue  | Non-Homogeneous | III |
| 56 | M | 34 | OSCC | Tongue  | Non-Homogeneous | IV  |
| 57 | M | 57 | OSCC | Tongue  | Non-Homogeneous | IV  |
| 58 | F | 50 | OSCC | Tongue  | Non-Homogeneous | IV  |
| 59 | M | 72 | OSCC | Tongue  | Non-Homogeneous | IV  |
| 60 | M | 47 | OSCC | Gingiva | Non-Homogeneous | IV  |

---
